# Supplementary material for: Photoresponse of an off-stoichiometry thiol–ene–epoxy (OSTE+) polymer
Source: Royal Society of Chemistry journal article supplement (doi:10.1039/d2tc02764j), 2022-01-01
Supplement: d2tc02764j1.pdf [file d2tc02764j1.pdf]

## Photoresponse of off-stoichiometry *thiol-ene-epoxy* (OSTE<sup>+</sup>) Polymer

Sonatan Das<sup>a</sup>, Akanksha Singh<sup>b</sup>, V. Ramgopal Rao<sup>b,a</sup>, Tapanendu Kundu<sup>a,c\*</sup>

<sup>a</sup>Centre for Research in Nanotechnology and Science, Indian Institute of Technology Bombay, Mumbai- 400076, India.

<sup>b</sup>Department of electrical engineering, Indian Institute of Technology Bombay, Mumbai- 400076, India

<sup>c</sup>Department of Physics, Indian Institute of Technology Bombay, Mumbai- 400076, India.

### Contact angle measurement:

The thickness of this thin film was found 32.6  $\mu\text{m}$  for the off- stoichiometry of 60% thiol and 40% allyl+epoxy. The contact angle of the monomer mixed liquid sample was found 93° as illustrated in Fig. S1.

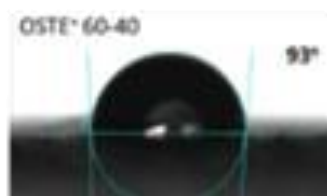

Fig. S1. Measured hydrophobicity of prepared monomer stock solution.

### Optoelectrical property:

The I-V under illumination from a broadband light source of a xenon lamp was measured using a UV-Visible optical fiber connected to the probe stage as shown in Fig. S2(a). The custom-designed I-V probe station was illuminated with the Xenon lamp to study the light illuminating device current characteristic. The xenon lamp intensity profile is measured in a photo-spectrometer and presented in Fig. S2(b) within the range of 200 nm to 450 nm wavelength.

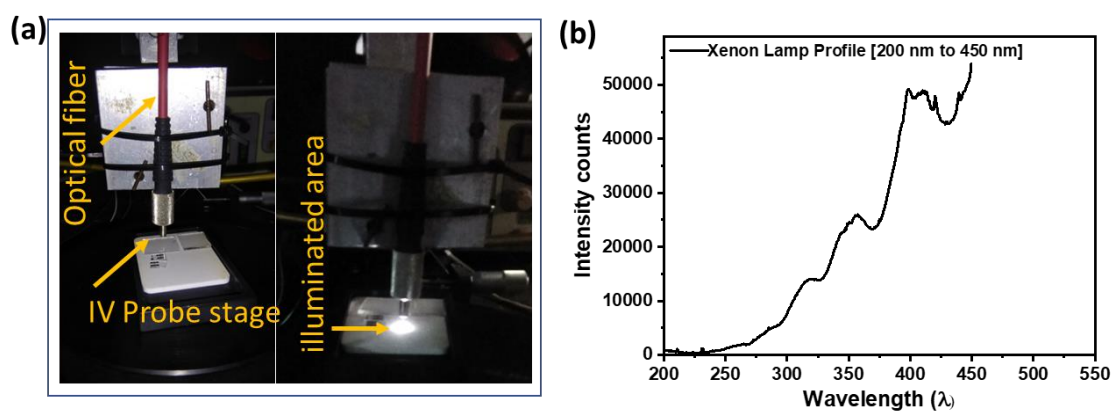

Fig. S2. (a) I-V probe illuminated by optical fiber connected with a Xenon lamp, (b) wavelength vs intensity profile of the xenon lamp [presented between 200 nm to 450 nm wavelength]

First, the electric field-assisted device current stability (time vs current) without any light illumination was studied. As observed in Fig. S3, the dark current stabilized around 60 to 70 seconds at +3V DC bias voltage. Any responsive behaviour was studied after stabilizing the dark current.

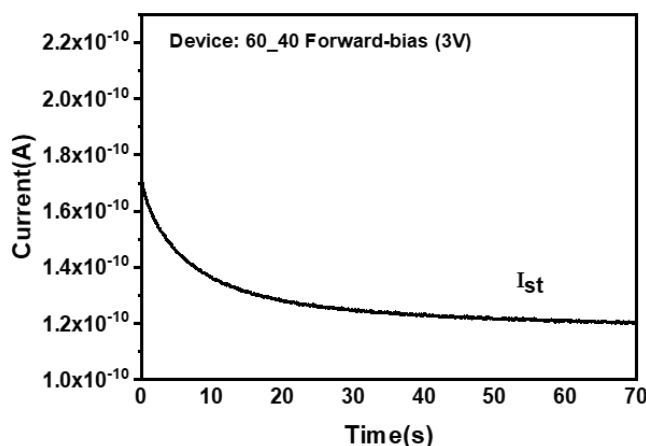

Fig. S3. The electric field-assisted current at +3V voltage was applied across the electrodes and waited around  $t_0=60$  to 70 seconds to stabilize the current.

The transient I-V was measured to understand the photo-responsive behaviour of this polymer device. For the transient characteristic, a microcontroller programmed mechanical chopper was used to create 20-second on-off states of laser light beam. The photoinduced current was measured at different laser power incidents on the device after 70 seconds of illumination.

### Time constant calculation:

The rise time constant ( $\tau_r$ ) was calculated from the exponential fitting of the rising edge data (interval of response to the rise of current from 10 to 90% of steady value) of the photo-current response as shown in Fig. S4 (on-state) due to different laser power irradiated on the device. The rise time was found to be  $\tau_r = 0.52 \pm 0.06$  seconds at  $18.49 \mu\text{W}$  power. Similarly, the decay time (interval of response to decay from 90 to 10% from its saturated current value) shows bi-exponential behavior with two different time constants  $\tau_{d1}$  and  $\tau_{d2}$  that were calculated from the fitting parameters (Fig. S4, off-state). The fast decay time was found  $\tau_{d1}=0.70 \pm 0.03$  seconds due to direct recombination of the photo-generated charge carriers. The longer time for the recombination was found from the slow decay time  $\tau_{d2}=6.6 \pm 0.13$  seconds. These decay times were found faster at higher laser power irradiated.

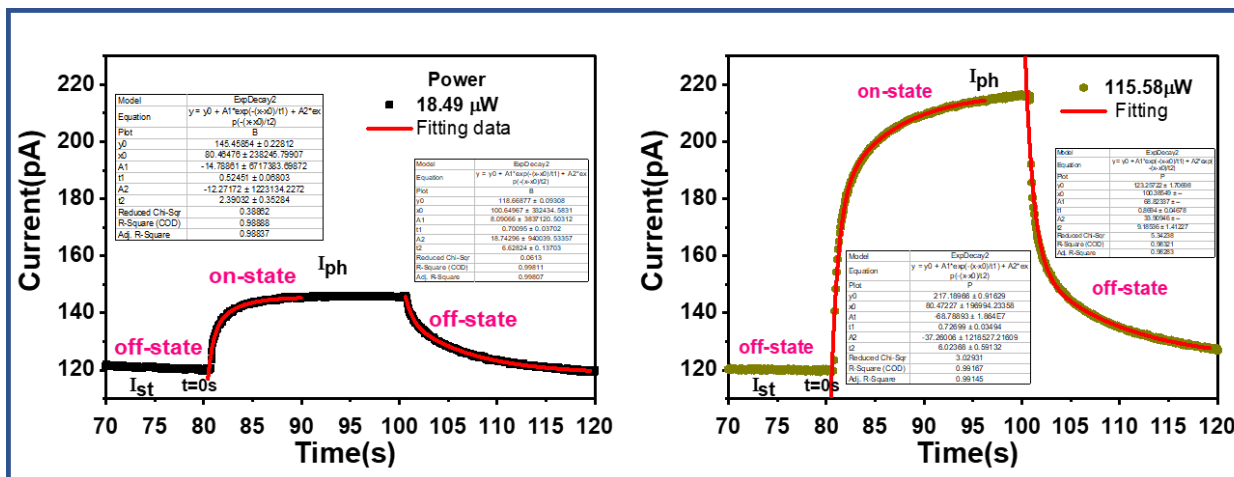

Fig. S4. Fitting of photoinduced current dynamics at various light intensity, rising time and decay time calculation.
